# Supplementary material for: Ru@Carbon Nanotube Composite Microsponge: Fabrication in Supercritical CO2 for Hydrogenation of p-Chloronitrobenzene
Source: MDPI journal article supplement (doi:10.3390/nano12030539), 2022-02-04
Supplement: s1 [file s1]

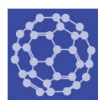

## Supplementary Materials

# Ru@Carbon Nanotube Composite Microsponge: Fabrication in Supercritical CO<sub>2</sub> for Hydrogenation of *p*-Chloronitrobenzene

Xianghong Ge <sup>1,\*</sup>, Hui Liu<sup>2,3</sup>, Xingxing Ding <sup>1</sup>, Yanyan Liu<sup>2,4</sup>, Xingsheng Li <sup>2</sup>, Xianli Wu <sup>2</sup> and Baojun Li<sup>1,\*</sup>

<sup>1</sup> Department of Physics, College of Science, Zhongyuan University of Technology; Zhengzhou Key Laboratory of Low-dimensional Quantum Materials and Devices, 41 Zhongyuan Road, Zhengzhou 450007, China; 5820@zut.edu.cn

<sup>2</sup> Research Center of Green Catalysis, College of Chemistry, Zhengzhou University, 100 Science Road, Zhengzhou 450001, China; lh610@zznu.edu.cn (H.L.); lyycarbon@henau.edu.cn (Y.L.); 18790251927@sina.com (X.L.); wuxianli@zzu.edu.cn (X.W.)

<sup>3</sup> School of Chemistry and Chemical Engineering, Zhengzhou Normal University, 6 Yingcai Road, Zhengzhou 450044, China

<sup>4</sup> Department of Applied Chemistry, College of Science, Henan Agricultural University, 95 Wenhua Road, Zhengzhou 450002, China

\* Correspondence: 5765@zut.edu.cn (X.G.); lbjfc@zzu.edu.cn (B.L.)

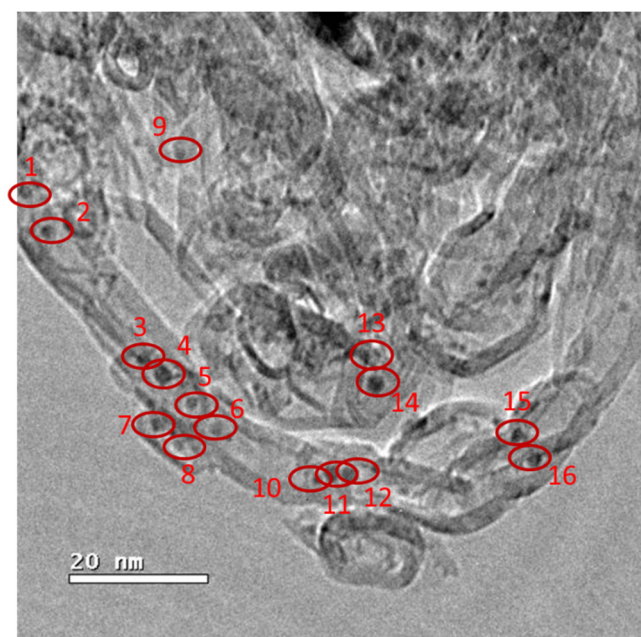

(a)

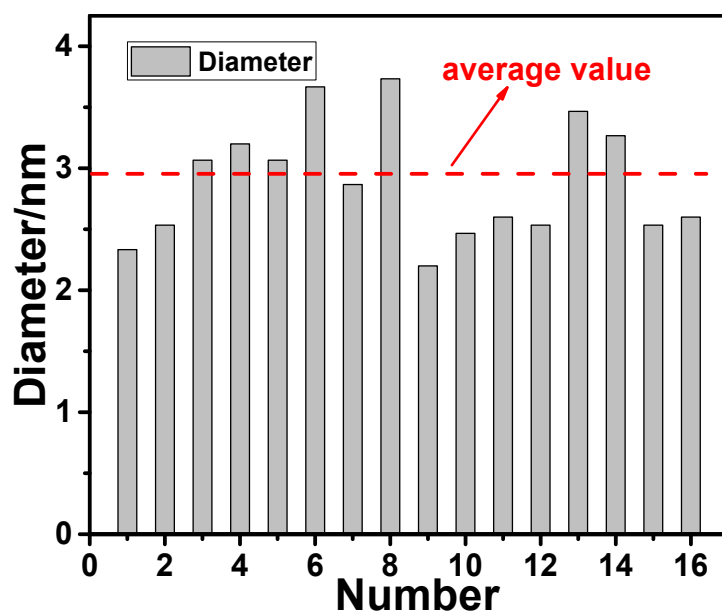

(b)

**Figure S1.** Size of particle diameter measured: (a) Ru particles selected, (b) corresponding diameter size.

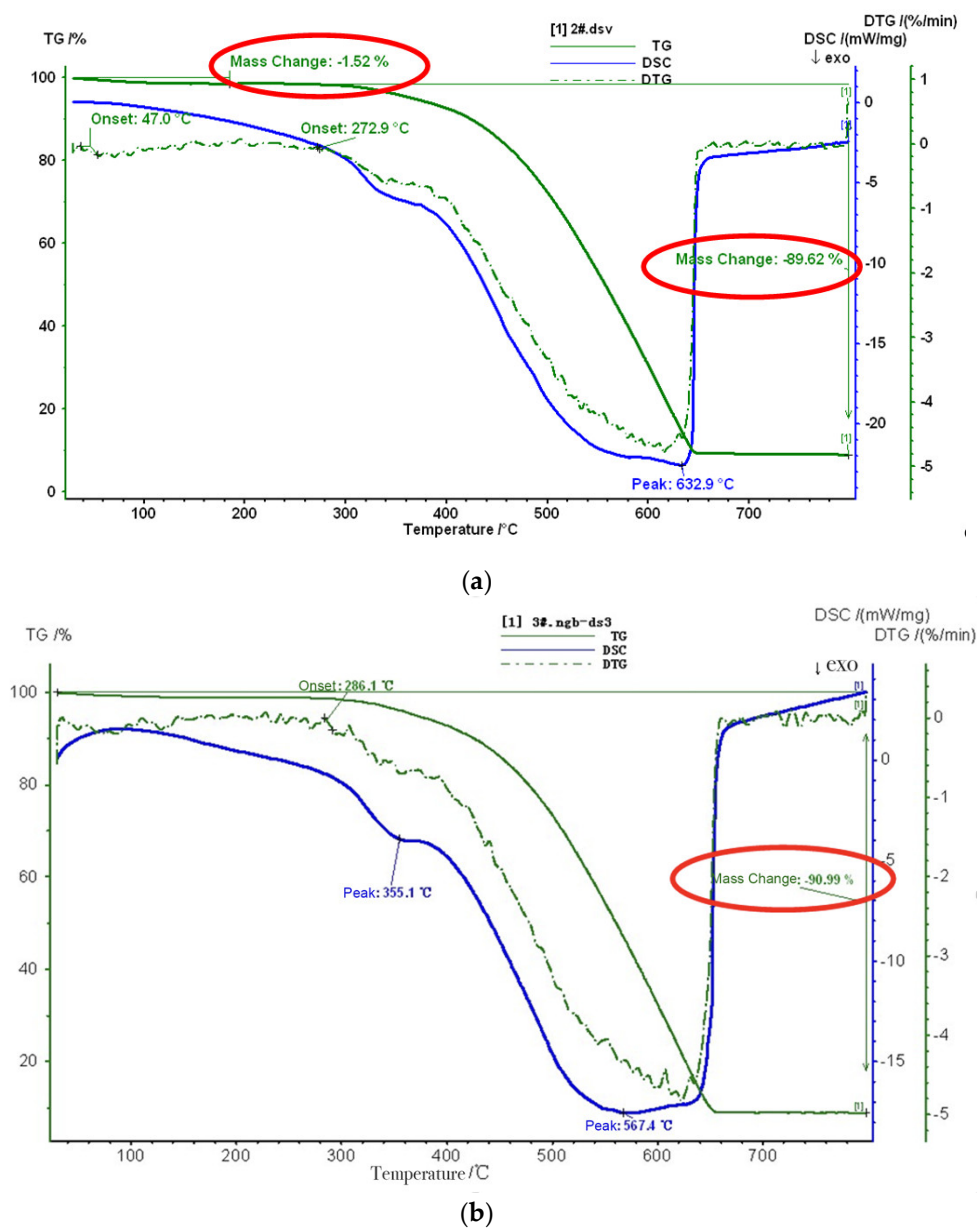

**Figure S2.** TG and DTG curves of (a) CR1 and (b) CR2.

The purity of CNTs provided by the manufacturer is about 95%, and grayscale of ash of CNTs in the total composition is  $5\% \times 0.6 / (0.6 + 0.0811) = 4.4\%$ , where „0.6” and „0.0811” represent the mass of CNTs and  $\text{RuCl}_3 \cdot n\text{H}_2\text{O}$ , respectively. According to the mass change, the ruthenium of load capacity in CR1 and CR2 is  $8.9\% - 4.4\% = 4.5\%$  and  $9.0\% - 4.4\% = 4.6\%$ , respectively. The quality ratio of ruthenium is only 4.6 wt%, the mass fraction of ruthenium loading on the outside of CNT is 0.58 wt%. The loading content of internal ruthenium of CR2 is:  $4.6\% - 0.58\% = 4.02\%$ , and the ruthenium into the internal accounts for  $4.02\% / 4.6\% = 87.4\%$ .

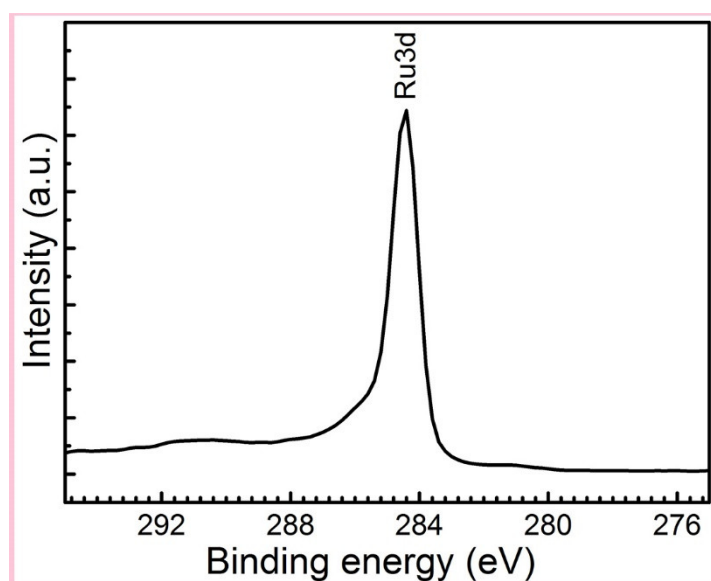

**Figure S3.** Fine XPS spectra of Ru3d of CR2.
